# Supplementary material for: Influence of redox initiator component ratios on the emulsion copolymerisation of vinyl acetate and neodecanoic acid vinyl ester
Source: Royal Society of Chemistry journal article supplement (doi:10.1039/d2ra01811j), 2022-01-01
Supplement: d2ra01811j1.pdf [file d2ra01811j1.pdf]

## Supporting Information

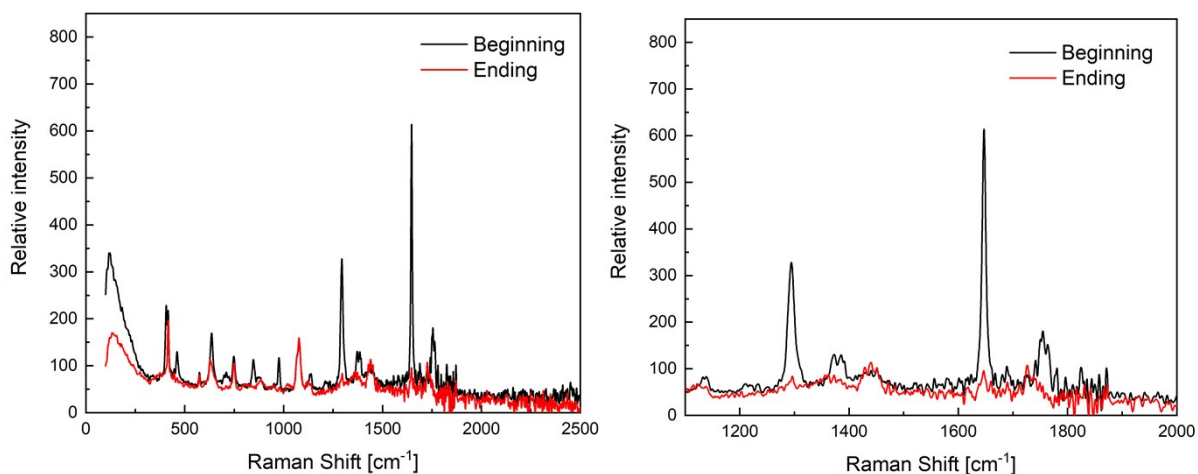

*Figure A1: Representative Raman spectrum before initiation (black line) and at the end of the reaction (red line). The whole spectrum is shown on the left and a cut-out of the relevant peak is shown on the right.*

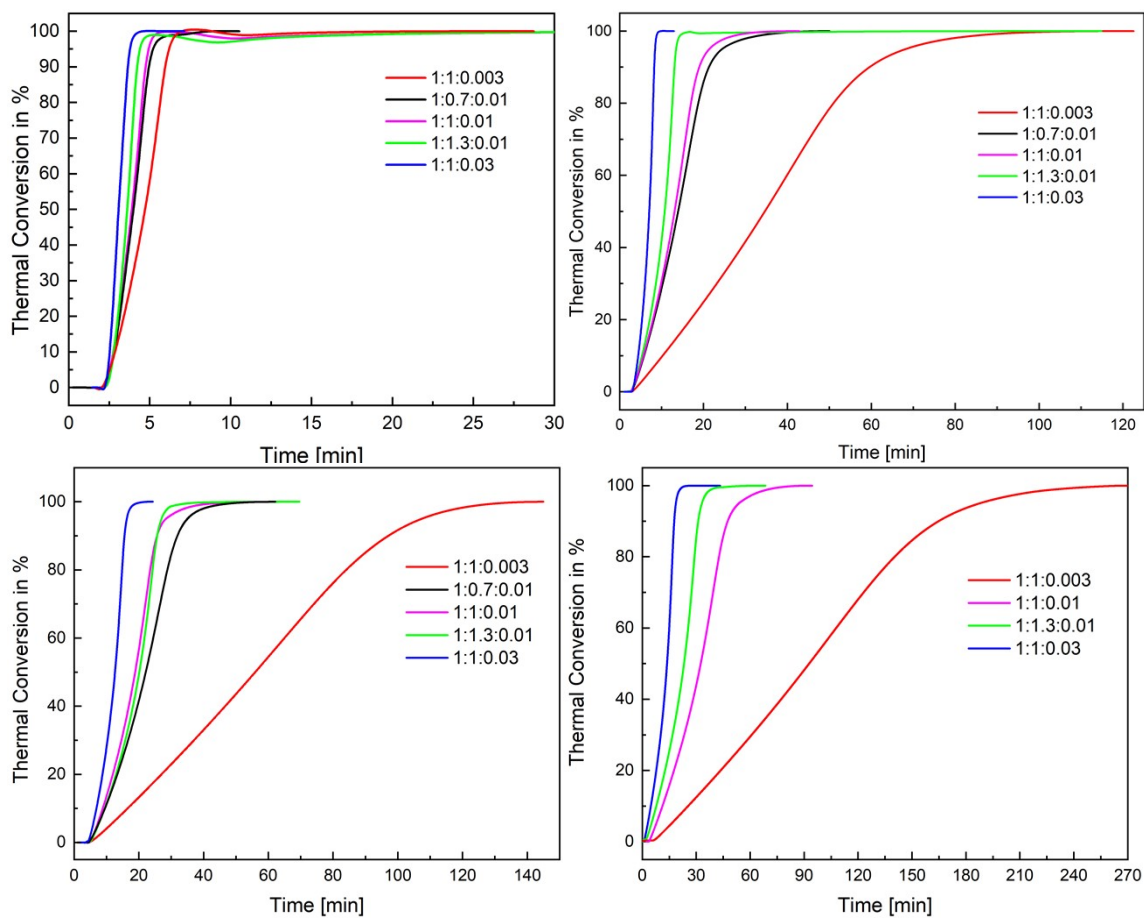

Figure A2: Representation of the thermal conversion as a function of time of all molar ratios at respectively 60 °C (upper left), 25 °C (upper right), 15 °C (lower left) and 5 °C (lower right).

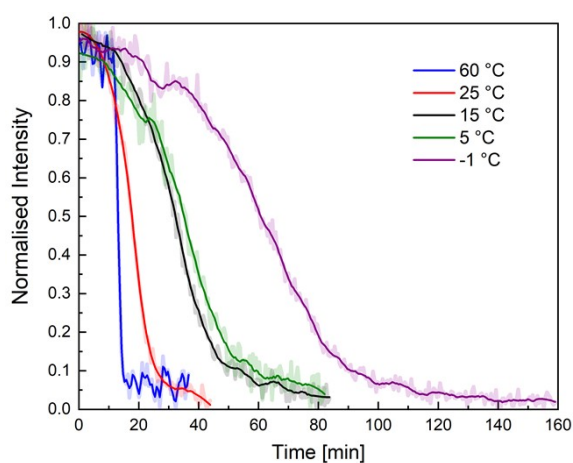

Figure A3: Representation of the normalised Raman conversion as a function of time at different initiation temperatures and a molar ratio of 1:0.7:0.01.

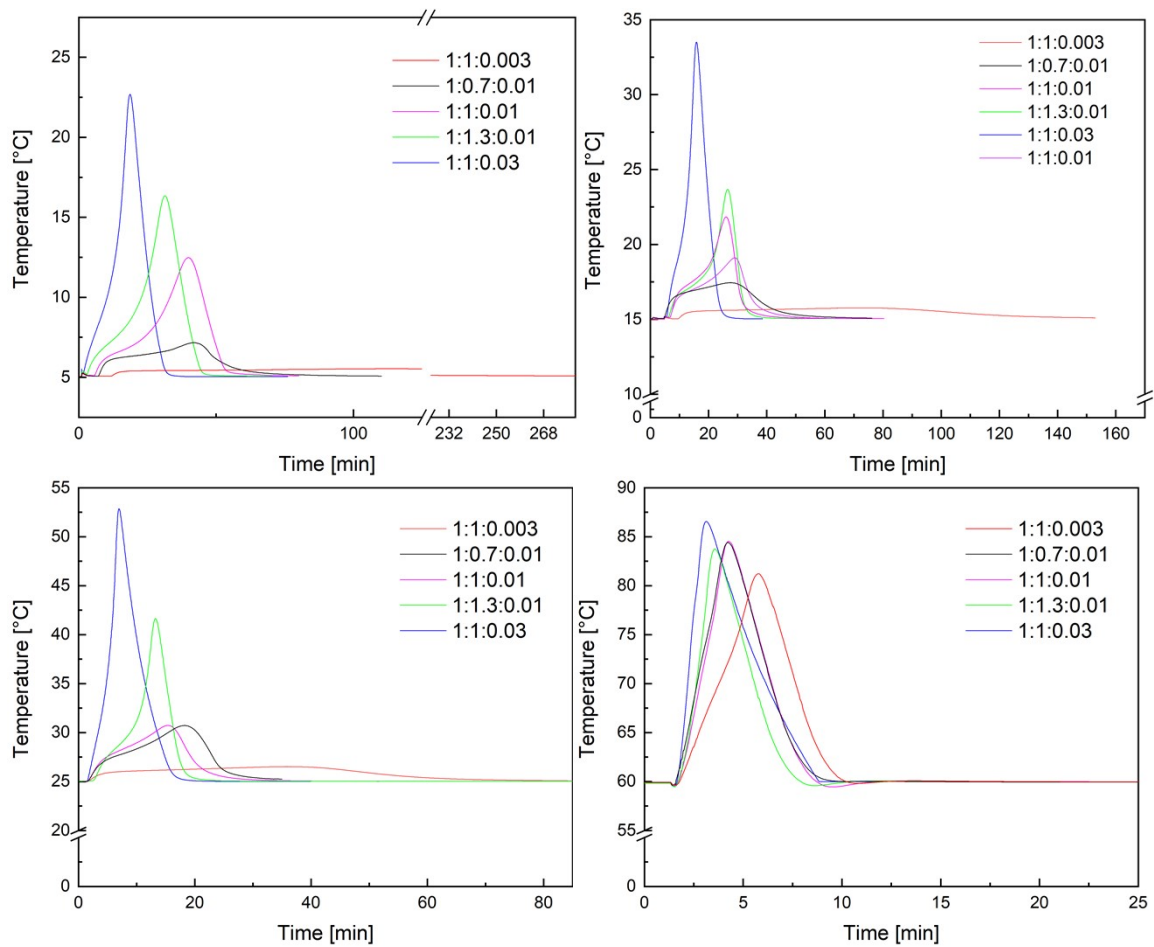

Figure A4: Temperature profile of the emulsion polymerisation.

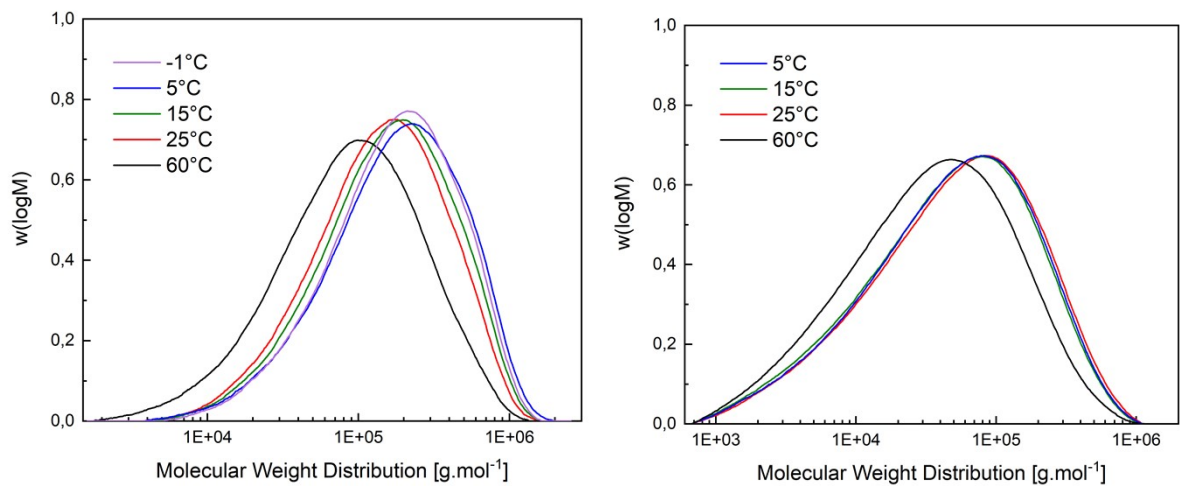

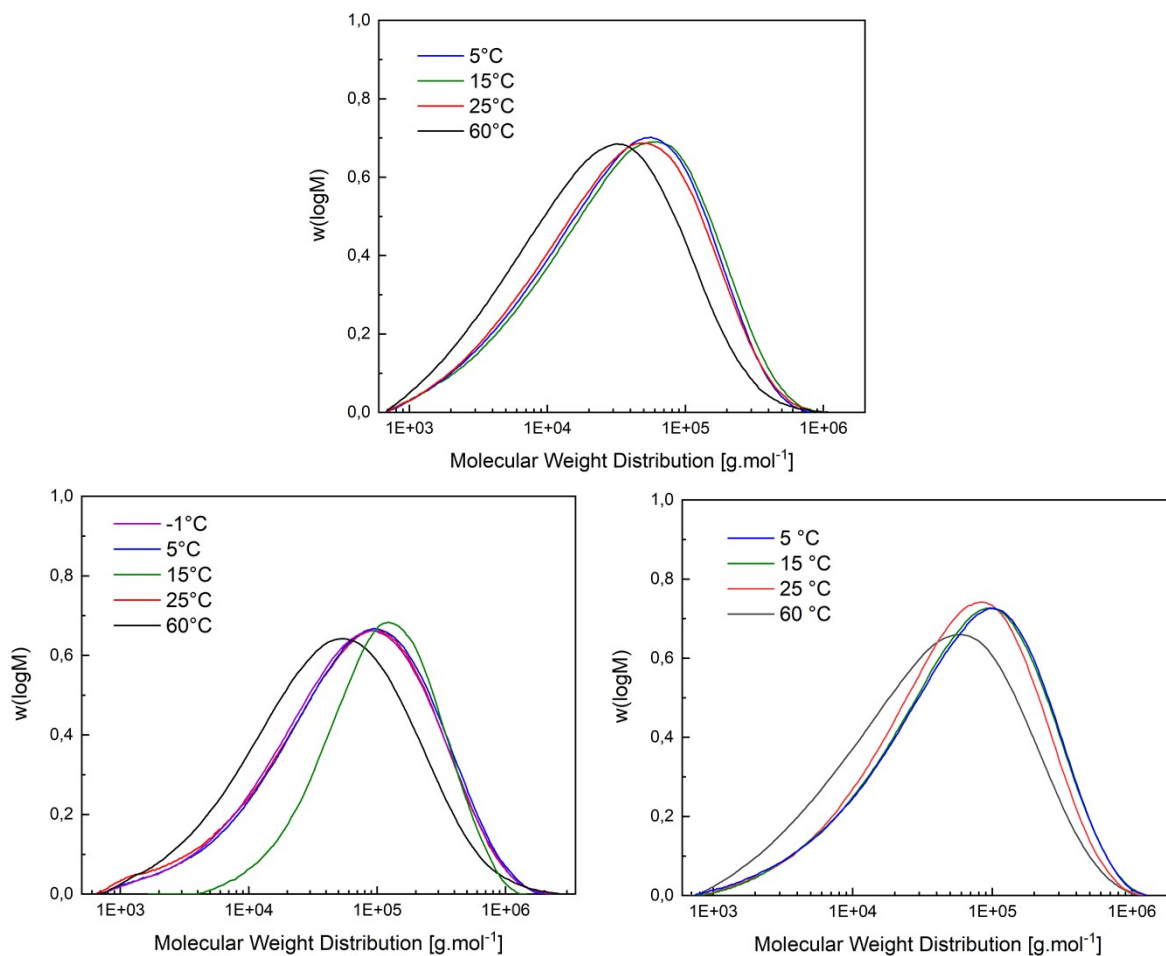

Figure A5: Influence of the initiation temperature on the molecular weight distribution, using different molar ratios of the redox components: 1:0.7:0.01 (upper left), 1:1:0.01 (upper right), 1:1.3:0.01 (middle), 1:1:0.03 (lower left) and 1:1:0.003 (lower right).

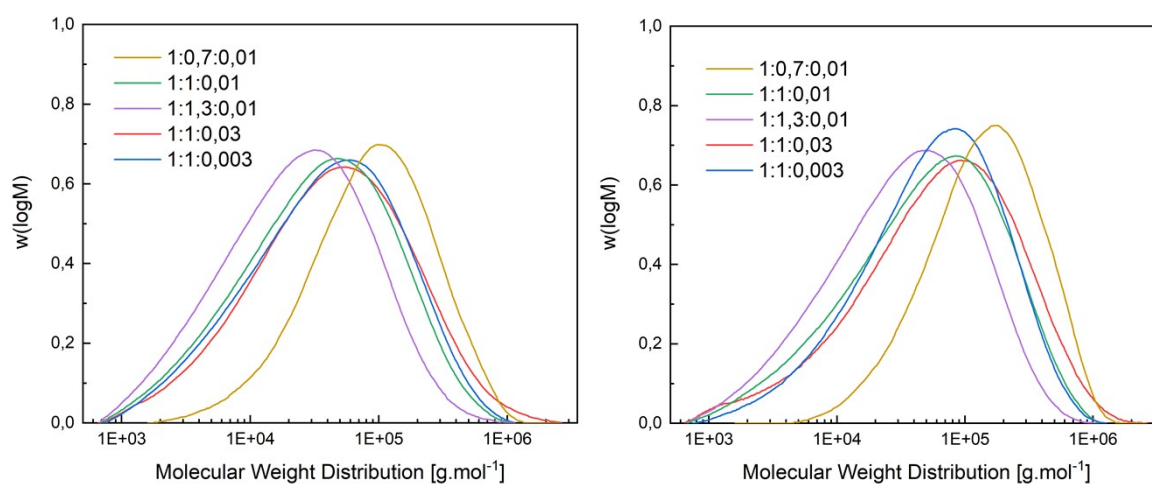

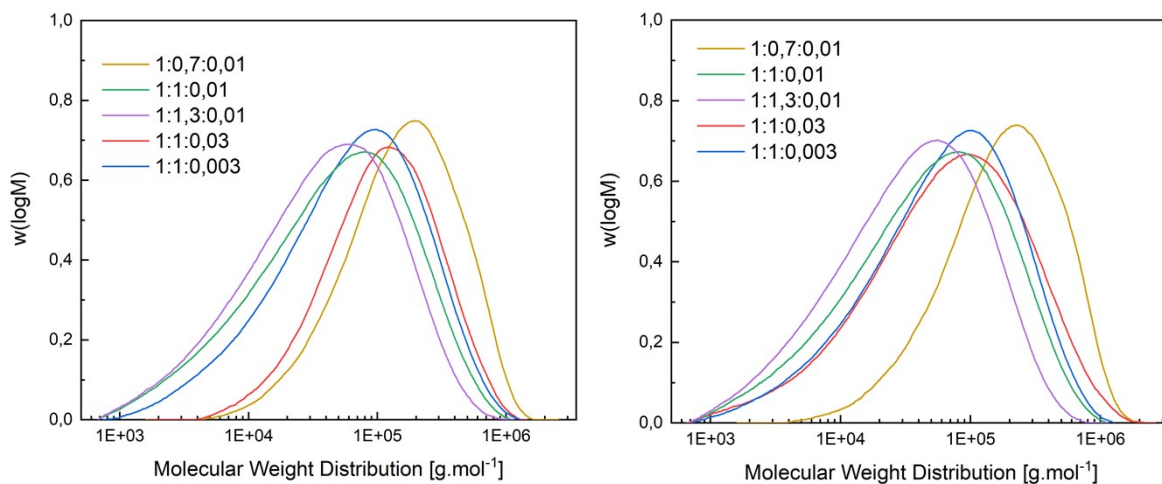

Figure A6: Molecular weight distribution at different operating conditions of the redox components and at different initiation temperatures: 60 °C (upper left), 25 °C (upper right), 15 °C (lower left) and 5 °C (lower right).

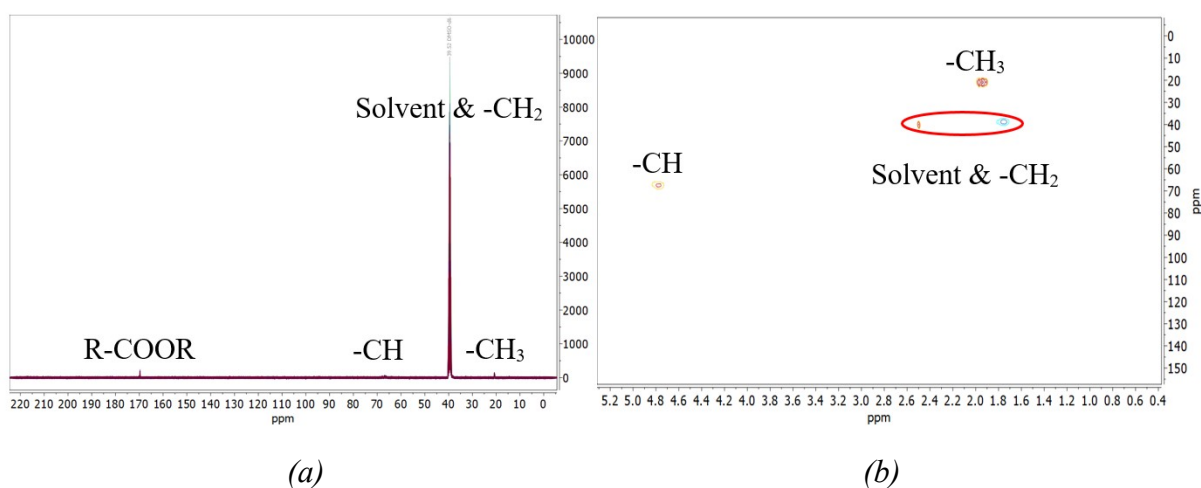

Figure A7 : Stacked 1D  $^{13}\text{C}$  NMR spectrum of all samples (a) and representative 2D HSQC spectrum (b).

Table A1: Analysis of variance table, model for prediction of  $M_n$ .

| Model Factor        | probability value [-] | F-value [-] | Variance inflation factor [-] |
|---------------------|-----------------------|-------------|-------------------------------|
| $r_{\text{tBHP}}$   | < 0.0001              | 197.54      | 1.01                          |
| $\vartheta_0$       | < 0.0001              | 93.82       | 1.01                          |
| $r_{\text{tBHP}}^2$ | < 0.0001              | 84.85       | 1.01                          |

Table A2: Analysis of variance table, model for prediction of  $M_w$ .

| Model Factor  | probability value [-] | F-value [-] | Variance inflation factor [-] |
|---------------|-----------------------|-------------|-------------------------------|
| $r_{tBHP}$    | < 0.0001              | 34.50       | 1.01                          |
| $\vartheta_0$ | < 0.0001              | 48.09       | 1.01                          |
| $r_{tBHP}^2$  | < 0.0001              | 3.72        | 1.01                          |

Table A3: Analysis of variance table, model for prediction of  $t_{99\%}$ .

| Model Factor    | probability value [-] | F-value [-] | Variance inflation factor [-] |
|-----------------|-----------------------|-------------|-------------------------------|
| $r_{Fe-cat.}$   | < 0.0001              | 34.11       | 1.04                          |
| $r_{tBHP}$      | < 0.0001              | 6.52        | 1.02                          |
| $\vartheta_0$   | 0.0212                | 328.4       | 1.15                          |
| $\vartheta_0^2$ | < 0.0001              | 13.54       | 1.18                          |

Table A4: Overview of the intensities of the signals in all  $^1\text{H}$ -NMR spectra.

| $R_{\text{Redox}}$ | Temperature [°C] | Integral CH | Integral OH 1 | Integral OH 2 | Integral OH 3 | Integral CH <sub>3</sub> | Integral CH <sub>2</sub> | Integral neo-C <sub>9</sub> H <sub>19</sub> |
|--------------------|------------------|-------------|---------------|---------------|---------------|--------------------------|--------------------------|---------------------------------------------|
| <b>1:0.7:0.01</b>  | 25               | 1.05        | 0.05          | 0.04          | 0.14          | 2.94                     | 2.00                     | 0.89                                        |
|                    | 15               | 1.05        | 0.07          | 0.05          | 0.15          | 2.93                     | 2.00                     | 0.97                                        |
|                    | 5                | 1.05        | 0.07          | 0.04          | 0.12          | 2.98                     | 2.00                     | 0.74                                        |
|                    | -1               | 1.03        | 0.05          | 0.03          | 0.08          | 2.94                     | 2.00                     | 0.83                                        |
|                    | 60               | 1.05        | 0.07          | 0.04          | 0.12          | 3.01                     | 2.00                     | 0.96                                        |
| <b>1:1:0.03</b>    | 25               | 1.06        | 0.06          | 0.04          | 0.15          | 3.00                     | 2.00                     | 0.75                                        |
|                    | 15               | 1.05        | 0.06          | 0.04          | 0.15          | 2.95                     | 2.00                     | 0.86                                        |
|                    | 5                | 1.03        | 0.09          | 0.03          | 0.11          | 3.00                     | 2.00                     | 0.71                                        |
|                    | -1               | 1.04        | 0.05          | 0.03          | 0.10          | 2.99                     | 2.00                     | 0.68                                        |
|                    | 60               | 1.07        | 0.16          | 0.05          | 0.19          | 2.95                     | 2.00                     | 1.18                                        |
| <b>1:1:0.003</b>   | 25               | 1.03        | 0.06          | 0.04          | 0.13          | 2.90                     | 2.00                     | 1.02                                        |
|                    | 15               | 1.02        | 0.06          | 0.03          | 0.10          | 2.93                     | 2.00                     | 1.00                                        |
|                    | 5                | 1.04        | 0.06          | 0.03          | 0.13          | 2.92                     | 2.00                     | 1.00                                        |
|                    | 60               | 1.03        | 0.07          | 0.04          | 0.14          | 2.95                     | 2.00                     | 1.25                                        |
| <b>1:1:0.01</b>    | 25               | 1.05        | 0.06          | 0.04          | 0.15          | 2.97                     | 2.00                     | 0.79                                        |
|                    | 15               | 1.04        | 0.06          | 0.04          | 0.13          | 2.97                     | 2.00                     | 0.73                                        |
|                    | 5                | 1.04        | 0.06          | 0.04          | 0.15          | 2.94                     | 2.00                     | 0.80                                        |
|                    | 60               | 1.06        | 0.06          | 0.04          | 0.15          | 2.98                     | 2.00                     | 1.08                                        |
| <b>1:1.3:0.01</b>  | 25               | 1.05        | 0.06          | 0.04          | 0.12          | 3.01                     | 2.00                     | 0.72                                        |
|                    | 15               | 1.05        | 0.06          | 0.04          | 0.12          | 2.98                     | 2.00                     | 0.74                                        |
|                    | 5                | 1.05        | 0.06          | 0.04          | 0.16          | 2.99                     | 2.00                     | 0.77                                        |
|                    | 60               | 1.07        | 0.09          | 0.06          | 0.22          | 2.99                     | 2.00                     | 1.14                                        |
